# Supplementary material for: Linkages between soil carbon, soil fertility and nitrogen fixation in Acacia senegal plantations of varying age in Sudan
Source: PeerJ. 2018 Jul 10;6:e5232. doi: 10.7717/peerj.5232 (PMC6044267; doi:10.7717/peerj.5232)
Supplement: Supplemental Information 4 [file peerj-06-5232-s004.xlsx]

## Sheet: Soil - tot & avail
Site Name	Age	Plot	Layer	Thickness cm	Bulk density	N%	C%	tot K_mg/g	tot P_mg/g	C_N	C_P	N/P	tot N_g/m2	C_g/m2	tot K_g/m2	tot P_g/m2	Pav_mg/g	Kex_mg/g	Pav_g/m2	Kex_g/m2	13C	15N
El Demokeya	0	1	1	10	1.6	0.0207511	0.178652	0.313888	0.0415737	8.60929	42.9723	4.99139	33.2017	285.843	50.2221	6.65179	0.0034	0.039	0.544	6.24	-18.6025	3.79234
El Demokeya	0	1	2	10	1.55	0.0153272	0.111313	0.436748	0.0383642	7.26246	29.0149	3.9952	23.7572	172.536	67.6959	5.94645	0.0022	0.0351	0.341	5.4405	-18.6642	2.68919
El Demokeya	0	1	3	10	1.61	0.0129025	0.104283	0.452308	0.0371689	8.0824	28.0565	3.4713	20.773	167.896	72.8217	5.9842	0.002	0.0312	0.322	5.0232	-19.0984	2.28365
El Demokeya	0	1	4	20	1.54	0.0123282	0.096339	0.528545	0.0426602	7.81453	22.5829	2.88986	37.9708	296.724	162.792	13.1393	0.003	0.039	0.924	12.012	-18.2918	1.99158
El Demokeya	0	2	1	10	1.6	0.0184552	0.172	0.438271	0.0514191	9.31987	33.4506	3.58917	29.5283	275.2	70.1234	8.22706	0.0041	0.05655	0.656	9.048
El Demokeya	0	2	2	10	1.55	0.0147972	0.140628	0.313714	0.0321084	9.50367	43.7979	4.60853	22.9357	217.973	48.6256	4.9768	0.0028	0.0585	0.434	9.0675
El Demokeya	0	2	3	10	1.61	0.0117674	0.114644	0.353853	0.0301552	9.74244	38.0178	3.90229	18.9456	184.576	56.9704	4.85499	0.0017	0.0429	0.2737	6.9069
El Demokeya	0	2	4	20	1.54	0.0108893	0.107113	0.386593	0.0303193	9.83647	35.3282	3.59156	33.5391	329.907	119.071	9.33833	0.0028	0.0585	0.8624	18.018
El Demokeya	0	3	1	10	1.6	0.0176183	0.164823	0.398599	0.040894	9.35518	40.3049	4.30829	28.1893	263.716	63.7758	6.54304	0.00375	0.0741	0.6	11.856
El Demokeya	0	3	2	10	1.55	0.0127299	0.122898	0.381172	0.0330429	9.65427	37.1935	3.85254	19.7314	190.492	59.0816	5.12165	0.0024	0.0507	0.372	7.8585
El Demokeya	0	3	3	10	1.61	0.0115449	0.112735	0.379728	0.0314235	9.76491	35.8761	3.67398	18.5873	181.504	61.1363	5.05919	0.0014	0.0429	0.2254	6.9069
El Demokeya	0	3	4	20	1.54	0.00910045	0.0917706	0.369836	0.0293028	10.0842	31.3181	3.10566	28.0294	282.653	113.91	9.02526	0.0029	0.0507	0.8932	15.6156
El Demokeya	15	1	1	10	1.61333	0.0191822	0.174811	0.401478	0.053166	9.11319	32.8802	3.60798	30.9472	282.028	64.7717	8.57745	0.0028	0.0689	0.4582	11.2801	-20.5395	8.94354
El Demokeya	15	1	2	10	1.70667	0.0117613	0.104724	0.35261	0.0401706	8.90416	26.0699	2.92784	20.0726	178.73	60.1787	6.85578	0.00213333	0.0468	0.3644	8.0054	-20.5766	6.64676
El Demokeya	15	1	3	10	1.69667	0.00995955	0.0934582	0.329021	0.0356898	9.38378	26.1863	2.79059	16.898	158.567	55.8239	6.05537	0.0026	0.0468	0.4414	7.9534	-20.1968	7.42479
El Demokeya	15	1	4	20	1.69	0.00848541	0.075732	0.336738	0.0381579	8.92496	19.847	2.22376	28.6807	255.974	113.817	12.8974	0.0026	0.0429	0.878267	14.5158	-21.5369	6.10118
El Demokeya	15	2	1	10	1.66333	0.0191807	0.208678	0.338342	0.0455846	10.8796	45.7783	4.20773	31.904	347.102	56.2776	7.58223	0.0032	0.065	0.531867	10.8342	-20.6266	6.74852
El Demokeya	15	2	2	10	1.69	0.0134614	0.154429	0.349854	0.0425028	11.472	36.334	3.16719	22.7498	260.986	59.1254	7.18297	0.00253333	0.0572	0.4276	9.672	-21.3459	6.9089
El Demokeya	15	2	3	10	1.68667	0.0104263	0.12326	0.373416	0.0420019	11.822	29.3462	2.48233	17.5856	207.898	62.9828	7.08433	0.003	0.0481	0.502133	8.1172	-20.7764	6.26381
El Demokeya	15	2	4	20	1.69667	0.00843649	0.102409	0.315959	0.0372191	12.1389	27.5153	2.26671	28.6278	347.509	107.215	12.6297	0.00186667	0.0572	0.631467	19.3648	-22.7959	5.19724
El Demokeya	15	3	1	10	1.64333	0.0178242	0.235099	0.351151	0.052877	13.1899	44.4615	3.37087	29.2911	386.346	57.7058	8.68946	0.0044	0.0689	0.722133	11.3061	-19.6085	8.11439
El Demokeya	15	3	2	10	1.62333	0.00931886	0.11391	0.346845	0.0449468	12.2236	25.3434	2.07331	15.1276	184.914	56.3046	7.29636	0.0026	0.0507	0.4208	8.1783	-19.3642	7.1287
El Demokeya	15	3	3	10	1.62667	0.00811055	0.100763	0.366317	0.044393	12.4237	22.698	1.82699	13.1932	163.908	59.5876	7.22125	0.00253333	0.0429	0.4134	7.0057	-19.2983	6.76385
El Demokeya	15	3	4	20	1.64333	0.00746782	0.0933326	0.361728	0.0422886	12.498	22.0704	1.76592	24.5442	306.753	118.888	13.8989	0.00253333	0.039	0.8316	12.8154	-20.098	6.54514
El Demokeya	24	1	1	10	1.51333	0.0386627	0.311819	0.464159	0.0631992	8.06511	49.339	6.11759	58.5095	471.886	70.2427	9.56414	0.00417519	0.091	0.631845	13.7228	-21.8022	10.6539
El Demokeya	24	1	2	10	1.59667	0.0176886	0.146058	0.449954	0.0489145	8.25718	29.8598	3.61623	28.2428	233.206	71.8427	7.81001	0.00269992	0.0676	0.431086	10.8303	-19.8972	7.65724
El Demokeya	24	1	3	10	1.48667	0.0146613	0.116955	0.471892	0.0536292	7.97714	21.8081	2.73382	21.7964	173.873	70.1546	7.97287	0.0024409	0.0767	0.36288	11.3854	-19.9866	5.7311
El Demokeya	24	1	4	20	1.46667	0.0134934	0.106422	0.297953	0.0434306	7.88697	24.5039	3.10688	39.5805	312.171	87.3997	12.7397	0.00234715	0.0611	0.688499	17.7788	-19.5702	6.14123
El Demokeya	24	2	1	10	1.55	0.0308749	0.262072	0.370563	0.0605083	8.48819	43.3118	5.10259	47.8561	406.212	57.4372	9.37878	0.00373244	0.0806	0.578529	12.3474	-20.3571	9.17222
El Demokeya	24	2	2	10	1.64667	0.0158129	0.146684	0.326599	0.04424	9.27618	33.1563	3.57435	26.0387	241.539	53.78	7.28486	0.00270548	0.0715	0.445503	11.5908	-19.7704	6.90544
El Demokeya	24	2	3	10	1.46667	0.0155427	0.127361	0.317205	0.0433918	8.1943	29.3515	3.58194	22.7959	186.797	46.5235	6.36413	0.00253352	0.0572	0.371582	8.4266	-19.3901	6.2008
El Demokeya	24	2	4	20	1.58667	0.0141666	0.116092	0.270224	0.0389278	8.19477	29.8223	3.63919	44.9552	368.398	85.7509	12.3531	0.00243322	0.0598	0.772141	18.9592	-19.3476	5.56303
El Demokeya	24	3	1	10	1.61667	0.0464386	0.359208	0.343464	0.0773875	7.73511	46.4168	6.00079	75.0758	580.72	55.5267	12.511	0.00459695	0.0884	0.743174	14.2467	-21.3	10.6443
El Demokeya	24	3	2	10	1.57667	0.0184173	0.170912	0.321698	0.0605876	9.27996	28.2091	3.03978	29.0379	269.471	50.721	9.55264	0.00292111	0.0546	0.460562	8.6125	-20.4197	8.47322
El Demokeya	24	3	3	10	1.61333	0.0148128	0.125827	0.363011	0.0612467	8.49448	20.5443	2.41855	23.898	203.001	58.5658	9.88113	0.00251986	0.0455	0.406538	7.3528	-20.1875	7.29084
El Demokeya	24	3	4	20	1.66	0.0125747	0.106994	0.332931	0.053194	8.50868	20.1139	2.36393	41.7479	355.22	110.533	17.6604	0.00235225	0.0585	0.780946	19.3934	-20.0206	6.3789
El Hemaira	0	1	1	10	1.65	0.0127611	0.122067	0.414996	0.0380552	9.56551	32.0762	3.35332	21.0559	201.41	68.4743	6.27911	0.003	0.0507	0.495	8.3655	-20.0042	1.7853
El Hemaira	0	1	2	10	1.67	0.0110957	0.0918967	0.332472	0.0272492	8.28219	33.7245	4.07193	18.5298	153.467	55.5228	4.55062	0.0014	0.039	0.2338	6.513	-19.5069	1.02658
El Hemaira	0	1	3	10	1.56	0.0116272	0.103273	0.352938	0.0301228	8.88203	34.2839	3.85992	18.1384	161.106	55.0584	4.69916	0.0024	0.039	0.3744	6.084	-19.7224	0.95
El Hemaira	0	1	4	20	1.63	0.0108122	0.0869612	0.35833	0.0312375	8.04286	27.8387	3.4613	35.2478	283.493	116.816	10.1834	0.0012	0.039	0.3912	12.714	-19.7262	0.871081
El Hemaira	0	2	1	10	1.65	0.0127761	0.123294	0.335885	0.0288297	9.65037	42.7665	4.43159	21.0806	203.436	55.421	4.7569	0.003	0.039	0.495	6.435
El Hemaira	0	2	2	10	1.67	0.0127152	0.122772	0.411741	0.0313326	9.65552	39.1834	4.05813	21.2344	205.029	68.7607	5.23254	0.0023	0.0429	0.3841	7.1643
El Hemaira	0	2	3	10	1.56	0.0103964	0.102885	0.363098	0.025653	9.89623	40.1063	4.05269	16.2183	160.5	56.6433	4.00187	0.0025	0.039	0.39	6.084
El Hemaira	0	2	4	20	1.63	0.0100657	0.100049	0.48307	0.0355011	9.93958	28.182	2.83533	32.8143	326.161	157.481	11.5734	0.0024	0.039	0.7824	12.714
El Hemaira	0	3	1	10	1.65	0.0124968	0.120899	0.436407	0.0358503	9.67438	33.7234	3.48584	20.6198	199.484	72.0071	5.91529	0.003	0.0429	0.495	7.0785
El Hemaira	0	3	2	10	1.67	0.0123379	0.119536	0.478966	0.035405	9.68853	33.7624	3.48478	20.6042	199.624	79.9873	5.91263	0.0032	0.039	0.5344	6.513
El Hemaira	0	3	3	10	1.56	0.0113119	0.110736	0.478933	0.0357762	9.7894	30.9526	3.16184	17.6465	172.749	74.7135	5.58108	0.0026	0.0429	0.4056	6.6924
El Hemaira	0	3	4	20	1.63	0.0103349	0.102358	0.476471	0.0357751	9.90407	28.6115	2.88887	33.6919	333.687	155.329	11.6627	0.0036	0.039	1.1736	12.714
El Hemaira	7	1	1	10	1.60667	0.0130702	0.129944	0.348222	0.0499293	9.94197	26.0256	2.61775	20.9995	208.777	55.9476	8.02197	0.0028	0.065	0.4504	10.4312	-21.9233	7.51956
El Hemaira	7	1	2	10	1.62667	0.00892942	0.107031	0.313181	0.040432	11.9864	26.4719	2.2085	14.5252	174.104	50.9442	6.57693	0.0024	0.0507	0.390933	8.2368	-21.0737	6.86885
El Hemaira	7	1	3	10	1.66	0.00854143	0.08564	0.324177	0.0386102	10.0264	22.1807	2.21222	14.1788	142.162	53.8135	6.40929	0.00166667	0.0507	0.274933	8.3395	-21.15	5.70938
El Hemaira	7	1	4	20	1.61333	0.00762227	0.0813022	0.314657	0.0359419	10.6664	22.6204	2.12072	24.5945	262.335	101.529	11.5973	0.00226667	0.052	0.7272	16.796	-20.1915	4.26459
El Hemaira	7	2	1	10	1.61	0.0176686	0.172137	0.264879	0.0470648	9.74249	36.5744	3.75411	28.4465	277.14	42.6454	7.57743	0.00293333	0.0481	0.466533	7.7077	-21.9217	6.51384
El Hemaira	7	2	2	10	1.61	0.0109247	0.121069	0.212509	0.0335801	11.0822	36.0539	3.25332	17.5887	194.922	34.2139	5.40639	0.00193333	0.0442	0.306133	7.0889	-21.7159	4.18984
El Hemaira	7	2	3	10	1.61	0.00908559	0.0965537	0.201344	0.0336735	10.6271	28.6735	2.69814	14.6278	155.451	32.4164	5.42144	0.00233333	0.052	0.373733	8.3824	-22.023	3.77374
El Hemaira	7	2	4	20	1.58667	0.0114779	0.116611	0.23823	0.0373426	10.1596	31.2273	3.07367	36.4231	370.045	75.5983	11.85	0.00213333	0.0455	0.6768	14.4352	-21.6367	4.78918
El Hemaira	7	3	1	10	1.55	0.0210191	0.251283	0.326056	0.0506855	11.955	49.5769	4.14697	32.5797	389.489	50.5387	7.85625	0.00346667	0.0546	0.5398	8.4201	-22.6976	8.10865
El Hemaira	7	3	2	10	1.57333	0.0126456	0.158343	0.277359	0.0397874	12.5216	39.7972	3.17829	19.8957	249.126	43.6378	6.25989	0.00326667	0.0533	0.514933	8.3746	-22.5728	5.28927
El Hemaira	7	3	3	10	1.56667	0.0100625	0.115836	0.320601	0.039035	11.5117	29.675	2.57782	15.7646	181.477	50.2275	6.11549	0.00273333	0.0442	0.4274	6.9095	-21.8341	4.00581
El Hemaira	7	3	4	20	1.63333	0.00858151	0.106734	0.299738	0.035559	12.4377	30.0161	2.41332	28.0329	348.665	97.9145	11.6159	0.00266667	0.0507	0.873733	16.614	-21.6089	3.79954
El Hemaira	15	1	1	10	1.53333	0.0323044	0.288235	0.457868	0.0656444	8.92247	43.9085	4.92112	49.5333	441.96	70.2065	10.0655	0.00386667	0.0689	0.590867	10.5768	-21.6077	9.15806
El Hemaira	15	1	2	10	1.54667	0.0190687	0.152472	0.420853	0.0467334	7.99593	32.6259	4.08031	29.4929	235.823	65.092	7.2281	0.00326667	0.052	0.505933	8.0457	-20.2208	7.99843
El Hemaira	15	1	3	10	1.58667	0.0165121	0.165888	0.459464	0.0433738	10.0464	38.246	3.80692	26.1991	263.208	72.9016	6.88198	0.0028	0.0559	0.443133	8.8647	-19.6316	7.29852
El Hemaira	15	1	4	20	1.57667	0.013921	0.144088	0.450622	0.0360581	10.3504	39.9599	3.86071	43.8976	454.357	142.096	11.3703	0.0022	0.078	0.693733	24.6142	-19.8213	6.5078
El Hemaira	15	2	1	10	1.63667	0.0267726	0.22348	0.414056	0.0541918	8.34735	41.2387	4.94034	43.8178	365.762	67.7672	8.86939	0.00373333	0.0702	0.611533	11.5037	-21.2351	8.46972
El Hemaira	15	2	2	10	1.63333	0.0199819	0.155342	0.421184	0.044349	7.77414	35.0272	4.50561	32.6371	253.726	68.7933	7.24366	0.0024	0.065	0.3906	10.6132	-20.3298	7.5858
El Hemaira	15	2	3	10	1.61333	0.0190314	0.161618	0.511799	0.0492521	8.49217	32.8145	3.86409	30.7041	260.744	82.5703	7.946	0.00213333	0.0637	0.3448	10.27	-20.2286	7.05115
El Hemaira	15	2	4	20	1.59667	0.0151669	0.135407	0.45305	0.0406133	8.92776	33.3405	3.73447	48.4331	432.399	144.674	12.9692	0.002	0.0559	0.638	17.7944	-19.2781	6.46105
El Hemaira	15	3	1	10	1.59333	0.0226382	0.197796	0.348971	0.0438358	8.73725	45.122	5.16433	36.0702	315.155	55.6027	6.9845	0.00273333	0.0793	0.435733	12.6464	-20.2574	8.35597
El Hemaira	15	3	2	10	1.62333	0.0146176	0.149601	0.283003	0.0279814	10.2343	53.4645	5.22405	23.7293	242.853	45.9408	4.54231	0.00233333	0.0533	0.378133	8.6528	-19.9653	5.62572
El Hemaira	15	3	3	10	1.63	0.0101275	0.0994599	0.303835	0.0284136	9.82073	35.0043	3.56433	16.5079	162.12	49.5251	4.63142	0.0022	0.0507	0.358533	8.2537	-19.5925	5.04603
El Hemaira	15	3	4	20	1.66333	0.00866738	0.101698	0.308166	0.0274117	11.7334	37.1001	3.16193	28.8335	338.315	102.516	9.11896	0.00226667	0.0559	0.753467	18.5614	-19.5588	3.5308
El Hemaira	20	1	1	10	1.57667	0.0323322	0.304272	0.526876	0.0644523	9.41083	47.2089	5.01644	50.977	479.736	83.0708	10.162	0.0046	0.0754	0.7234	11.8378	-21.9182	9.03423
El Hemaira	20	1	2	10	1.57667	0.0162551	0.181274	0.480935	0.0420386	11.1518	43.1207	3.86672	25.6289	285.808	75.8274	6.62809	0.003	0.0559	0.472467	8.8309	-19.8042	7.04748
El Hemaira	20	1	3	10	1.56333	0.0150241	0.145266	0.507034	0.0412239	9.66887	35.2382	3.6445	23.4876	227.099	79.2663	6.44467	0.0024	0.0455	0.375	7.1149	-19.8	6.86552
El Hemaira	20	1	4	20	1.59667	0.0184595	0.175189	0.538952	0.0449583	9.49046	38.9671	4.10592	58.9474	559.438	172.105	14.3567	0.00226667	0.0416	0.7192	13.2808	-20.4479	7.16337
El Hemaira	20	2	1	10	1.53	0.0437612	0.331212	0.682647	0.0799209	7.56862	41.4425	5.47556	66.9546	506.754	104.445	12.2279	0.0041	0.1001	0.627467	15.3179	-22.1631	10.1141
El Hemaira	20	2	2	10	1.49667	0.0220387	0.211731	0.57396	0.0488387	9.60723	43.3531	4.51255	32.9846	316.89	85.9027	7.30952	0.00316667	0.0806	0.4727	12.1173	-18.5604	8.57399
El Hemaira	20	2	3	10	1.57667	0.0190332	0.139266	0.515745	0.0418719	7.317	33.26	4.54558	30.009	219.576	81.3158	6.6018	0.003	0.0754	0.473533	11.9132	-18.9725	7.98631
El Hemaira	20	2	4	20	1.61333	0.0155816	0.162727	0.478339	0.0379295	10.4435	42.9025	4.10804	50.2766	525.066	154.344	12.2386	0.003	0.0611	0.965333	19.708	-18.0649	6.75501
El Hemaira	20	3	1	10	1.55667	0.0264378	0.247156	0.28984	0.0444237	9.34859	55.6362	5.95129	41.1549	384.74	45.1185	6.91529	0.00333333	0.0637	0.518067	9.8566	-21.7478	8.23412
El Hemaira	20	3	2	10	1.56	0.0155371	0.142601	0.297059	0.0374561	9.17806	38.0715	4.14809	24.2379	222.457	46.3412	5.84314	0.00273333	0.0559	0.4278	8.6983	-21.287	6.67597
El Hemaira	20	3	3	10	1.53	0.0113923	0.114414	0.238271	0.0284162	10.0431	40.2636	4.0091	17.4303	175.053	36.4554	4.34768	0.00226667	0.0481	0.346733	7.3619	-20.7369	5.8372
El Hemaira	20	3	4	20	1.64	0.0102592	0.111155	0.255306	0.0301209	10.8346	36.9028	3.406	33.6502	364.588	83.7404	9.87967	0.00206667	0.0559	0.6784	18.2936	-20.5066	4.78151

## Sheet: Foliage & grass NPK & 15N
Site Name	Age	Plot No.	Sample description	K_mg/g	P_mg/g	N_mg/g	N/P	15N
El Demokeya	15	1	AcaciaLeaves	4.603	0.671348	41.3802	61.6374	7.01198
El Demokeya	15	2	AcaciaLeaves	4.57806	0.637003	40.7187	63.9222	4.80552
El Demokeya	15	3	AcaciaLeaves	4.69192	0.728664	38.0344	52.1974	7.7617
El Demokeya	24	1	Acacia Leaves	4.74266	0.699771	40.7239	58.196	5.30707
El Demokeya	24	2	Acacia Leaves	4.18273	0.625031	37.526	60.0386	7.95717
El Demokeya	24	3	Acacia Leaves	3.54539	0.67414	39.9467	59.2558	7.80124
El Hemaira	7	1	Acacia Leaves	4.50072	0.545079	40.0531	73.4813	10.0939
El Hemaira	7	2	Acacia Leaves	6.72858	0.538801	35.011	64.9795	7.87986
El Hemaira	7	3	Acacia Leaves	4.49116	0.554012	40.1659	72.5002	8.43743
El Hemaira	15	1	Acacia Leaves	2.92506	0.573701	40.9502	71.379	9.03318
El Hemaira	15	2	Acacia Leaves	3.71189	0.573488	39.513	68.8994	8.34884
El Hemaira	15	3	Acacia Leaves	3.87271	0.539069	43.6336	80.9424	9.32601
El Hemaira	20	1	Acacia Leaves	5.30524	1.35588	40.7603	30.0619	8.80712
El Hemaira	20	2	Acacia Leaves	4.24705	0.633181	44.8989	70.91	8.88599
El Hemaira	20	3	Acacia Leaves	3.62509	0.604901	34.365	56.8109	6.42763
El Demokeya	0	1	Ground veg.	25.2188	2.50608	12.3638	4.93351	3.13746
El Demokeya	0	1	Ground veg.	21.7103	2.85526	11.9197	4.17463	2.6215
El Demokeya	15	1	Ground veg.	21.4337	3.05306	11.5642	3.78772	2.34648
El Demokeya	15	1	Ground veg.	14.7982	1.82667	13.8801	7.59859	2.21911
El Demokeya	15	1	Ground veg.	22.9247	2.61081	10.2567	3.92854	4.3819
El Demokeya	15	1	Ground veg.	20.2893	1.83604	10.807	5.88605	3.80798
El Demokeya	24	1	Ground veg.	20.6796	2.23724	11.4531	5.11931	4.30058
El Demokeya	24	1	Ground veg.	9.16006	1.42354	13.143	9.23266	1.68724
El Demokeya	24	1	Ground veg.	12.6984	1.77539	11.3252	6.37897	4.55461
El Demokeya	24	1	Ground veg.	23.5135	1.74937	14.2708	8.15769	5.43007
El Demokeya	24	1	Ground veg.	16.9143	1.64565	14.9442	9.08101	3.06686
El Hemaira	0	1	Ground veg.	16.3022	0.803971	10.8834	13.5371	6.18465
El Hemaira	0	1	Ground veg.	17.9893	0.944009	12.755	13.5116	5.43598
El Hemaira	7	1	Ground veg.	9.3761	1.32679	13.3545	10.0652	8.41263
El Hemaira	7	1	Ground veg.	25.0529	1.18684	14.1952	11.9605	5.5717
El Hemaira	7	1	Ground veg.	6.90972	1.29433	11.6855	9.0282	6.194
El Hemaira	7	1	Ground veg.	19.2509	1.61702	22.3959	13.8501	9.0453
El Hemaira	7	1	Ground veg.	22.4087	1.82835	19.1129	10.4536	10.2527
El Hemaira	15	1	Ground veg.	14.5687	1.29859	8.18701	6.30452	3.91149
El Hemaira	15	1	Ground veg.	17.6174	1.4829	9.12767	6.15528	4.7262
El Hemaira	15	1	Ground veg.	20.1503	1.77099	10.134	5.72222	4.7469
El Hemaira	15	1	Ground veg.	26.625	1.53632	17.1277	11.1485	8.35822
El Hemaira	15	1	Ground veg.	22.3689	2.71463	13.6608	5.0323	6.00674
El Hemaira	20	1	Ground veg.	18.1307	3.30054	12.2189	3.70208	5.14993
El Hemaira	20	1	Ground veg.	32.5946	3.04229	18.8416	6.19324	8.52351
El Hemaira	20	1	Ground veg.	27.8882	4.45486	16.4152	3.68478	6.89057
El Hemaira	20	1	Ground veg.	35.2064	4.43866	25.6435	5.77731	6.84317
El Hemaira	20	1	Ground veg.	39.8856	4.59257	22.875	4.98088	6.14725
